# Supplementary material
Source: Springer Nature journal article supplement (https://www.springermedizin.de/resource/supplementary/12943_2009_521_MOESM8_ESM.pdf/9555004)

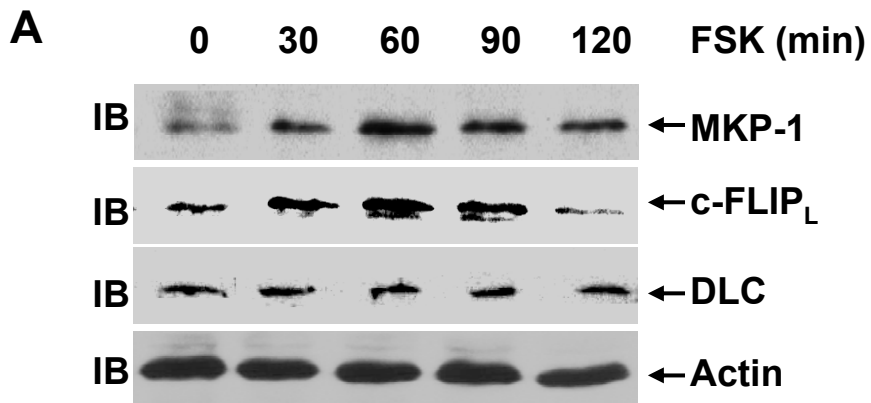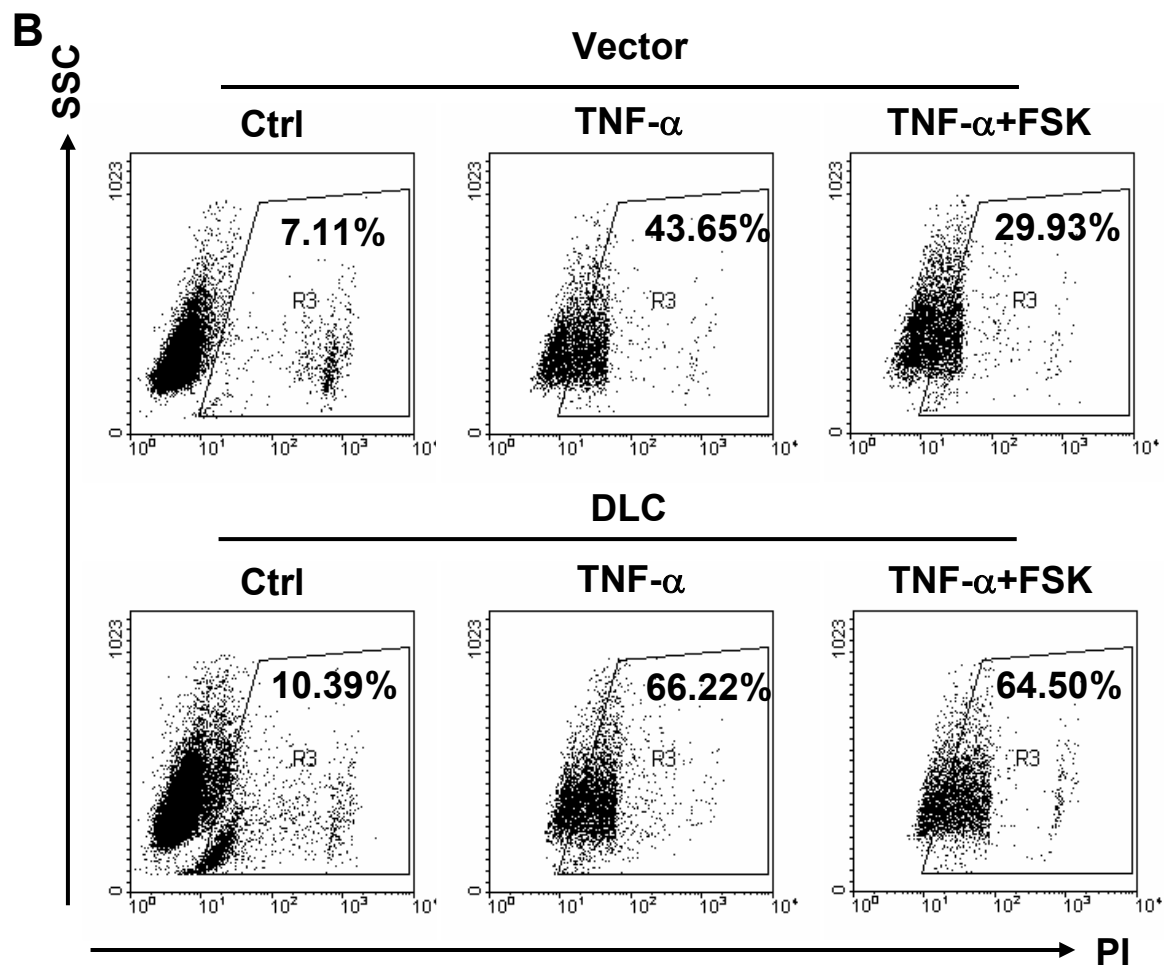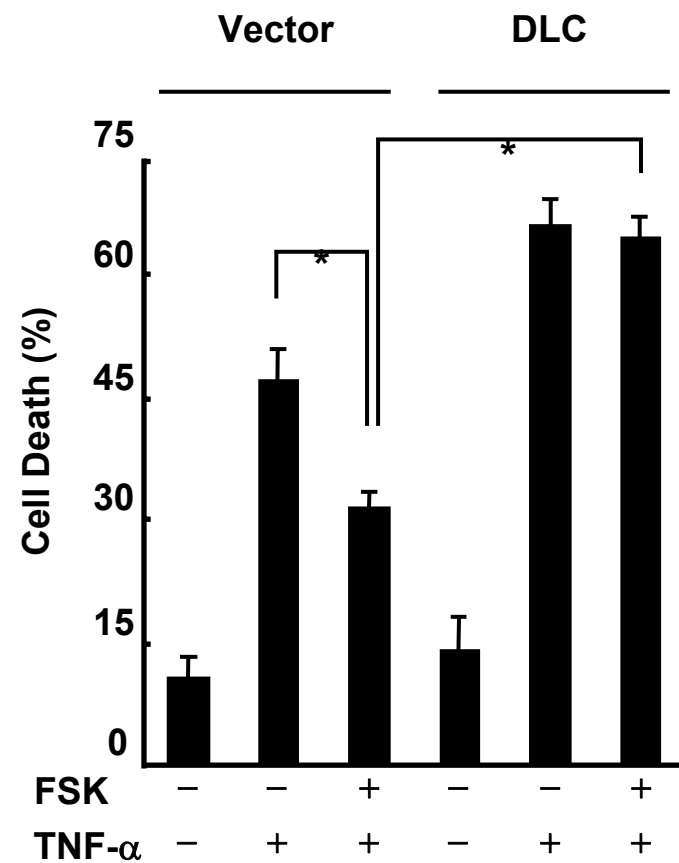

Supplement: MOESM8 [file 9555004]
